# Supplementary material for: Photochemically assisted formation of silver nanoparticles by dithizone, and its application in amperometric sensing of cefotaxime
Source: Royal Society of Chemistry journal article supplement (doi:10.1039/c4tc01090f), 2014-01-01
Supplement: c4tc01090f1.pdf [file c4tc01090f1.pdf]

## **Supporting Information (SI):**

### **Photochemical Assisted Formation of Silver Nanoparticles by Dithizone and its Application in Amperometric Sensing of Cefotaxime**

**Sandeep Gupta, Rajiv Prakash\***

School of Materials Science and Technology  
Indian Institute of Technology (Banaras Hindu University)  
Varanasi-221005, India

\*Corresponding Author: Fax: +91-542-2368707

E-mail: [rajivprakash12@yahoo.com](mailto:rajivprakash12@yahoo.com)

SI-1

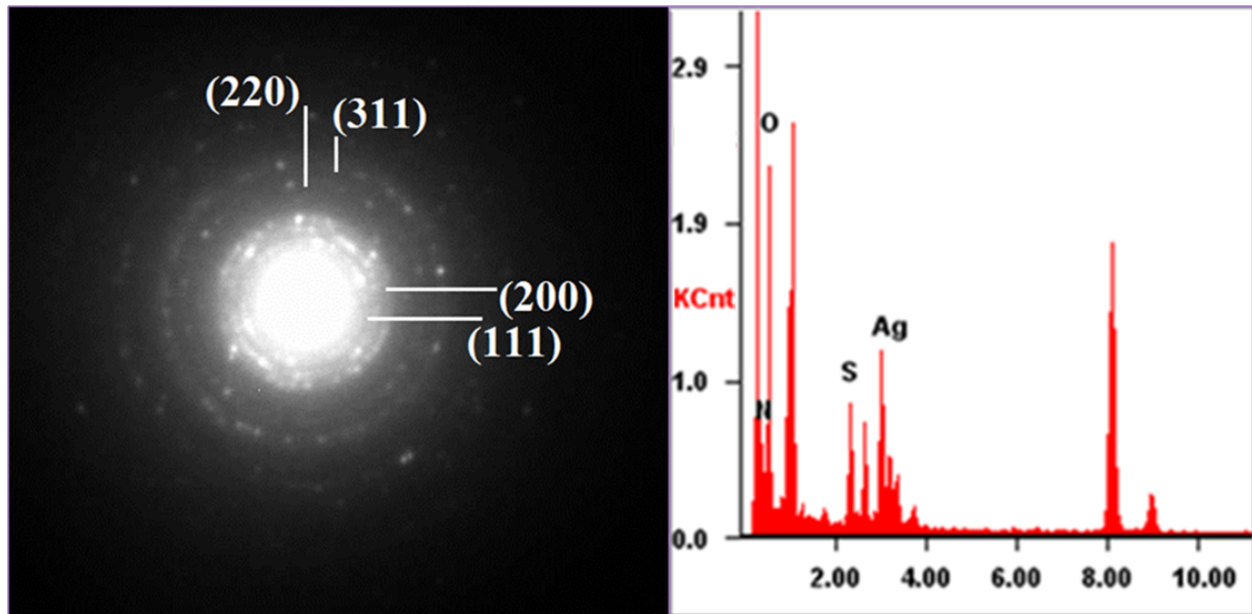

**Figure SI-1.** SAED and EDAX spectrum of the corresponding TEM images of silver nanoparticles.

## SI-2

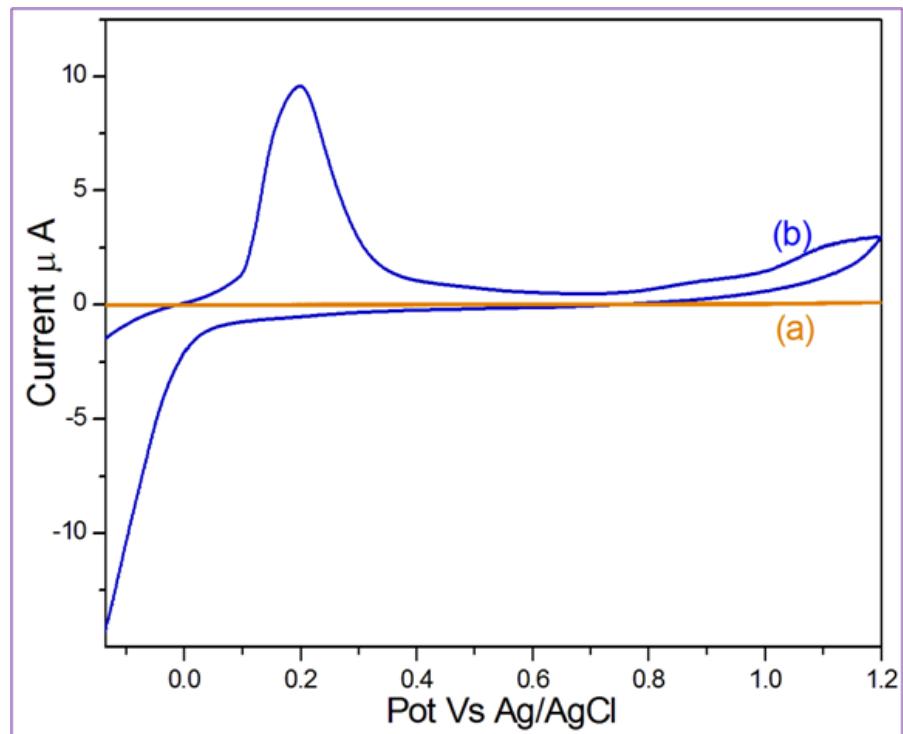

**Figure SI-2.** (a) CV of bare unmodified electrode (b) modified electrode with Ag-DTZH  
Characteristics CV of AgNPs

Characteristics voltammograms of hybrid nanomaterial (Ag-DTZH) showing the oxidation of silver which confirm the electrode is modified with material and support the result.
